# Supplementary material
Source: Springer Nature journal article supplement (https://www.springermedizin.de/resource/supplementary/12885_2013_5277_MOESM3_ESM.pdf/9465636)
Supplement: MOESM3 [file 9465636]

Additional Table 3. List of *PIK3R1* mutations found in the present study.

| Sample | <i>PIK3R1</i> mutation |                          |      | <i>PIK3CA</i> mutation |
|--------|------------------------|--------------------------|------|------------------------|
|        | Nucleotide             | Codon                    | Exon |                        |
| 1      | c.1345_1347del         | p.Leu449del              | 11   | no                     |
| 2      | c.1351_1368del         | p.Glu451_Phe456del       | 11   | no                     |
| 3      | c.1650_1688dup         | p.Lys551_Met563dup       | 13   | no                     |
| 4      | c.1701_1727del         | p.Pro568_Thr576del       | 13   | no                     |
| 5      | c.1718_1723dup         | p.Arg574_Lys575insMetArg | 13   | p.His1047Arg           |
| 6      | c.1723_1731del         | p.Lys575_Arg577del       | 13   | no                     |
| 7      | c.1727_1729del         | p.Thr576del              | 13   | no                     |
| 8      | c.1738_1743del         | p.Tyr580_Leu581del       | 13   | no                     |
| 9      | c.1738_1743del         | p.Tyr580_Leu581del       | 13   | no                     |
| 10     | c.1925G>T              | p.Arg642Leu              | 15   | no                     |
